# Supplementary material
Source: PubMed Central journal article supplement (PMC4758699)

**Fig 1. IL-35 blockade reduces tumor burden in multiple transplantable tumor models**

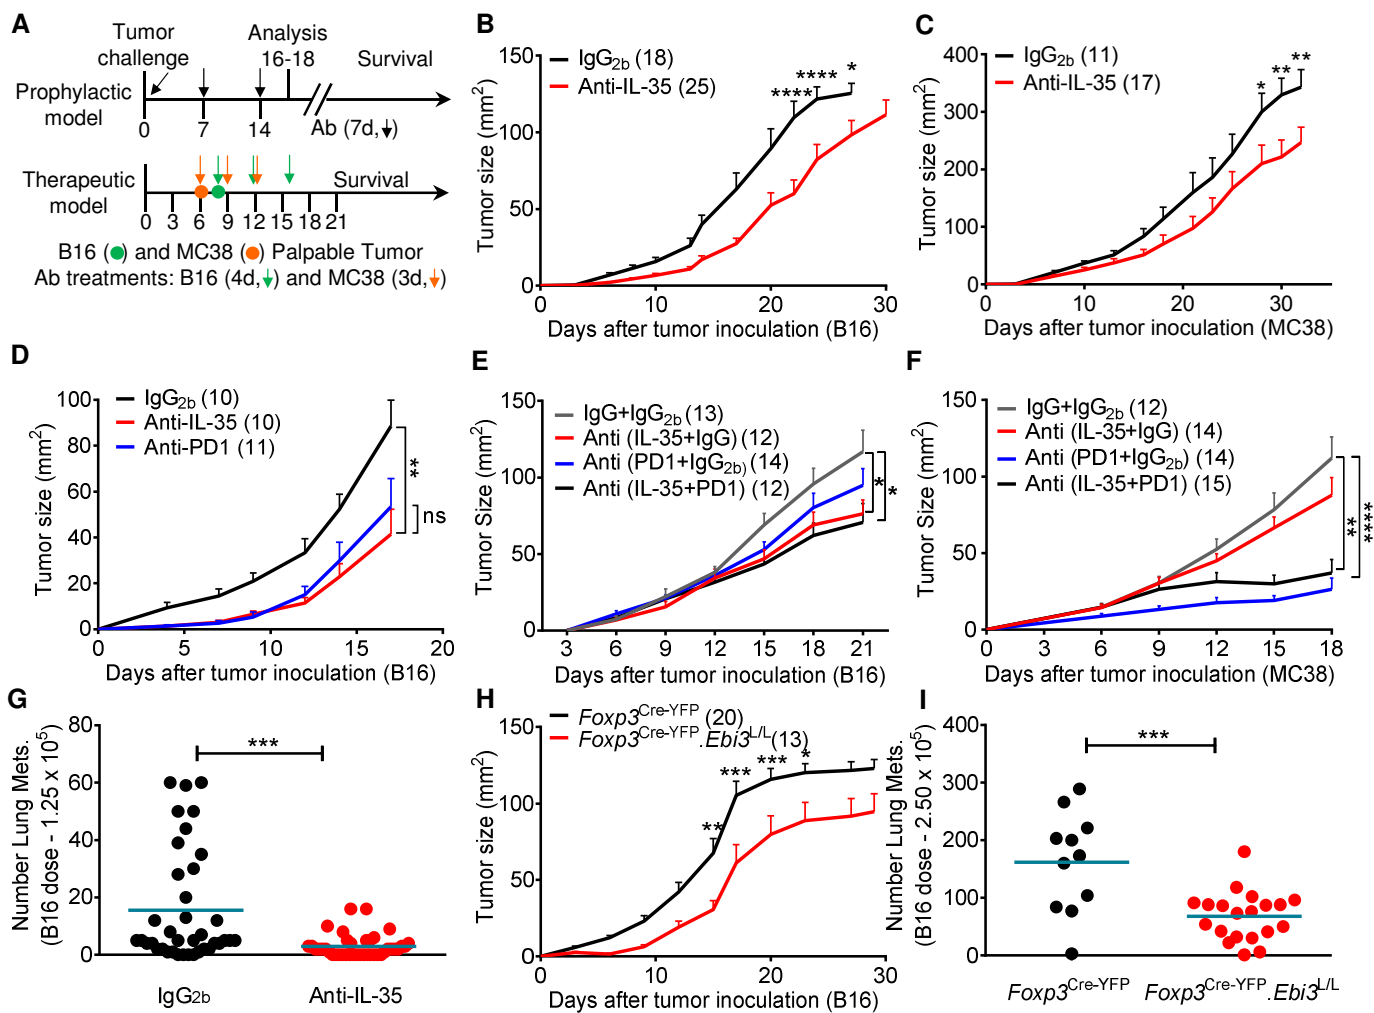

**Fig 2. Neutralization of IL-35 enhances anti-tumor immune memory**

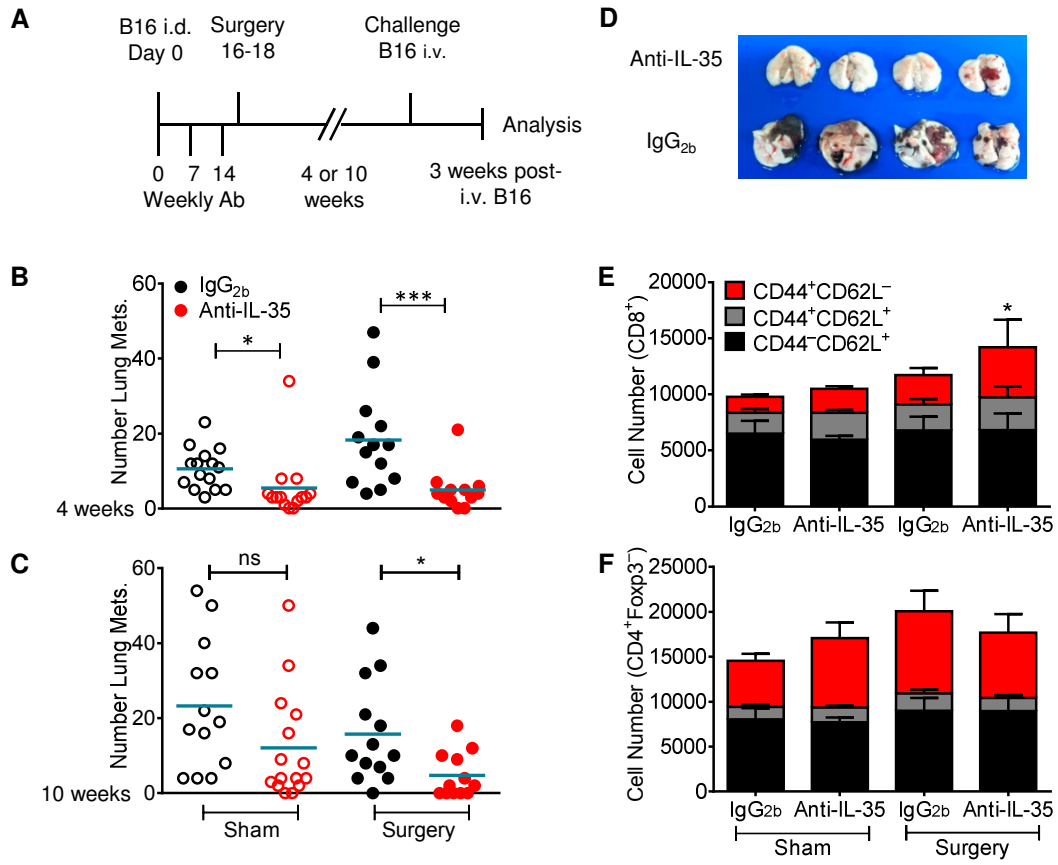

**Fig 3. Neutralization of IL-35 enhances anti-tumor immunity in a genetically-induced tumor model**

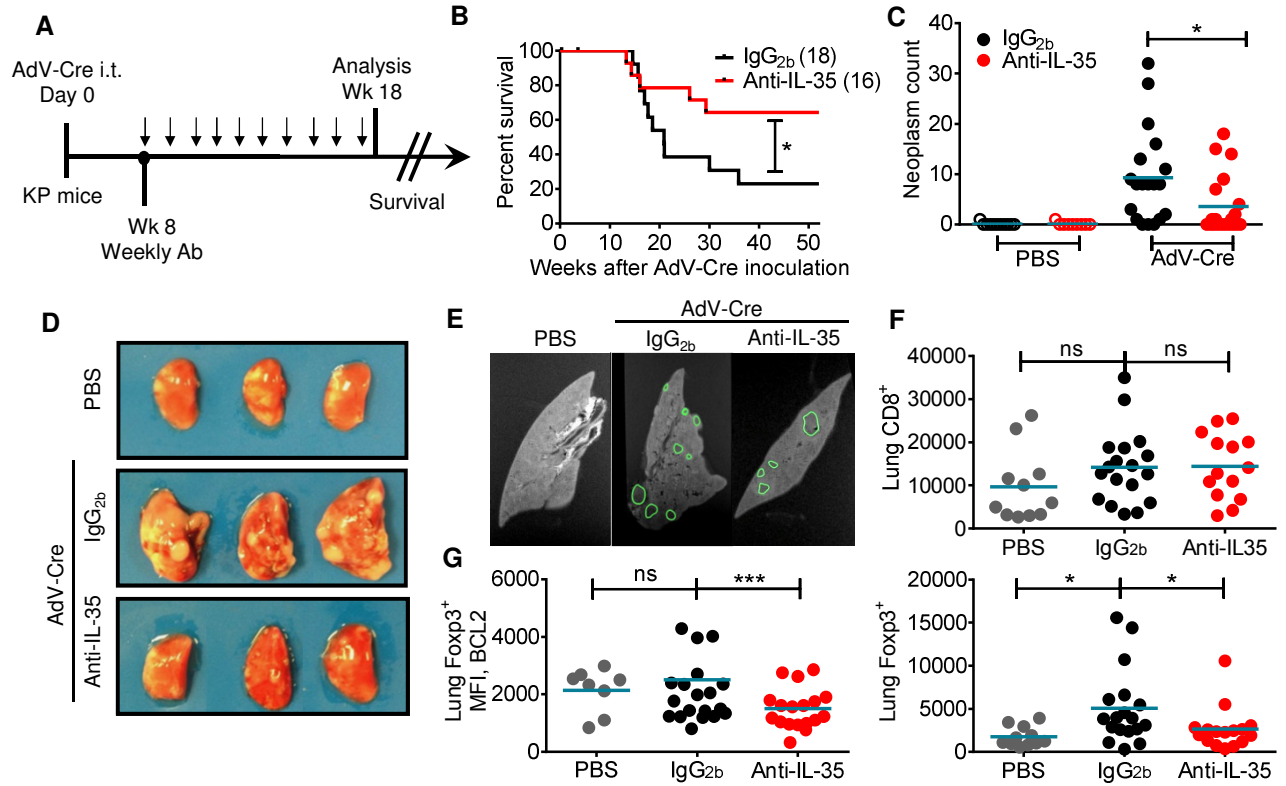

**Fig 4. Increased percentages of functionally superior IL-35-expressing Tregs in TILs**

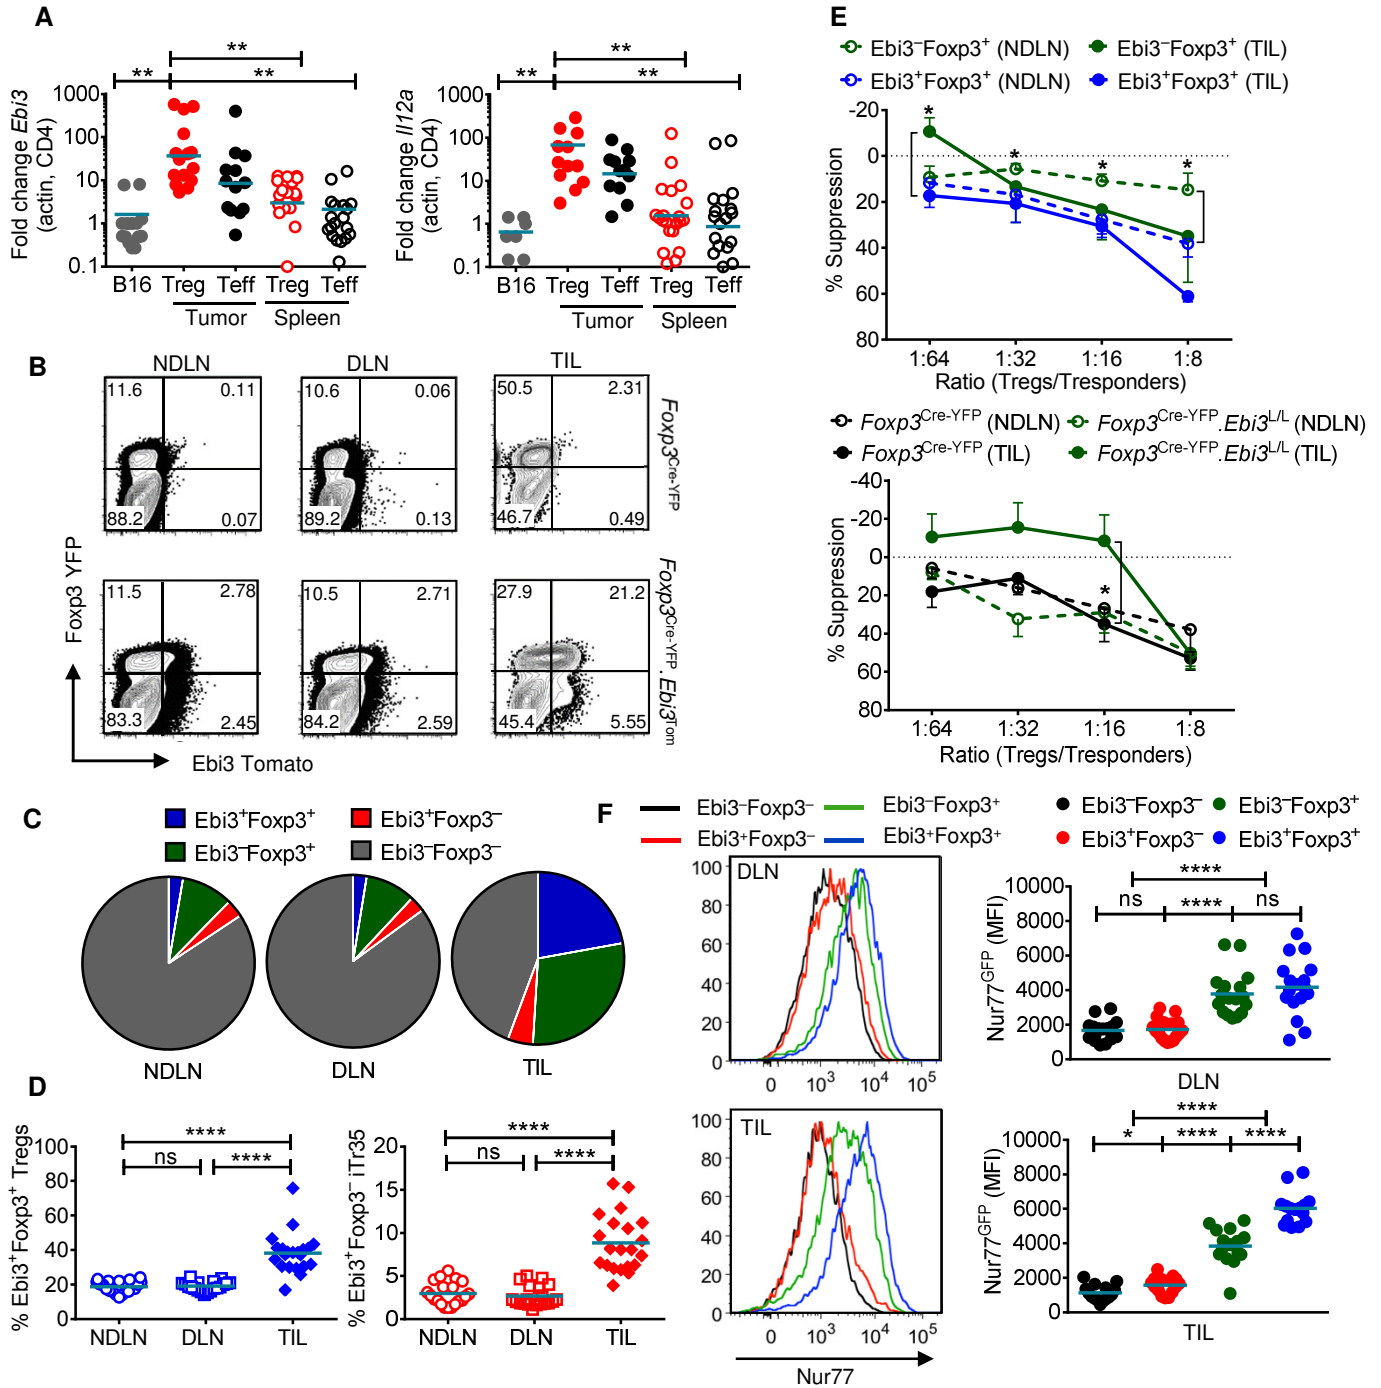

**Fig 5. Increased infiltration and activation in the TILs of IL-35-neutralized mice**

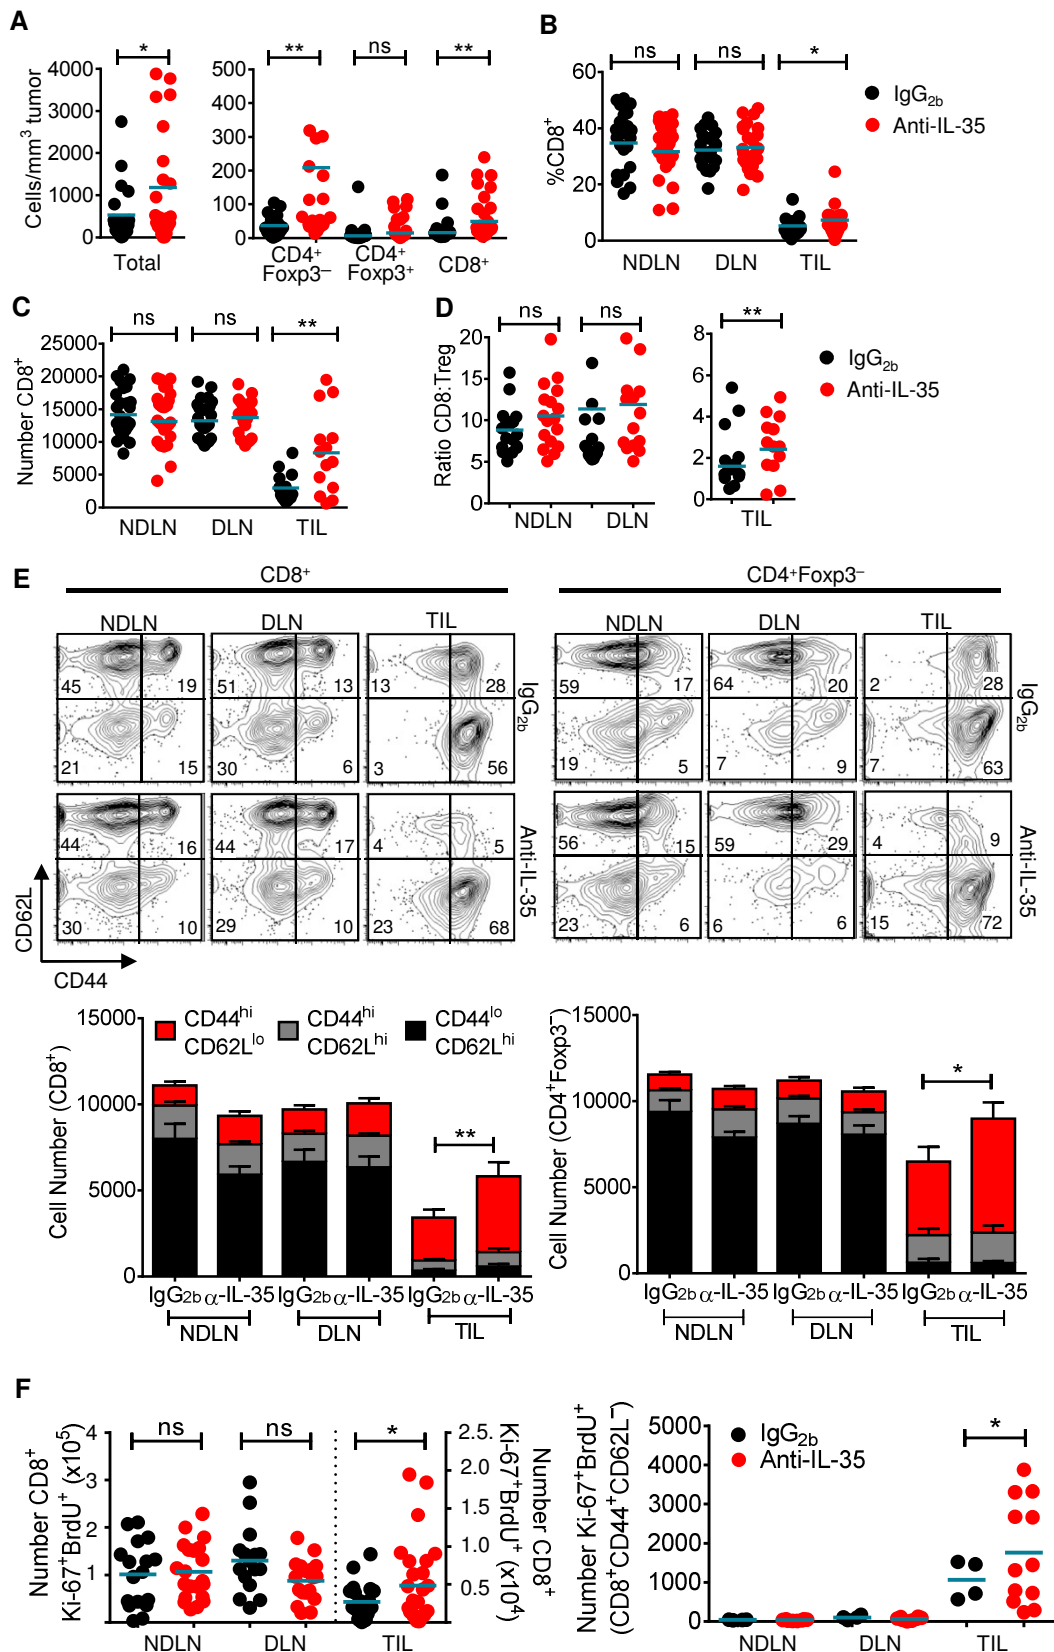

**Fig 6. Enhanced cytokine production in tumor-associated tissues of IL-35-neutralized animals**

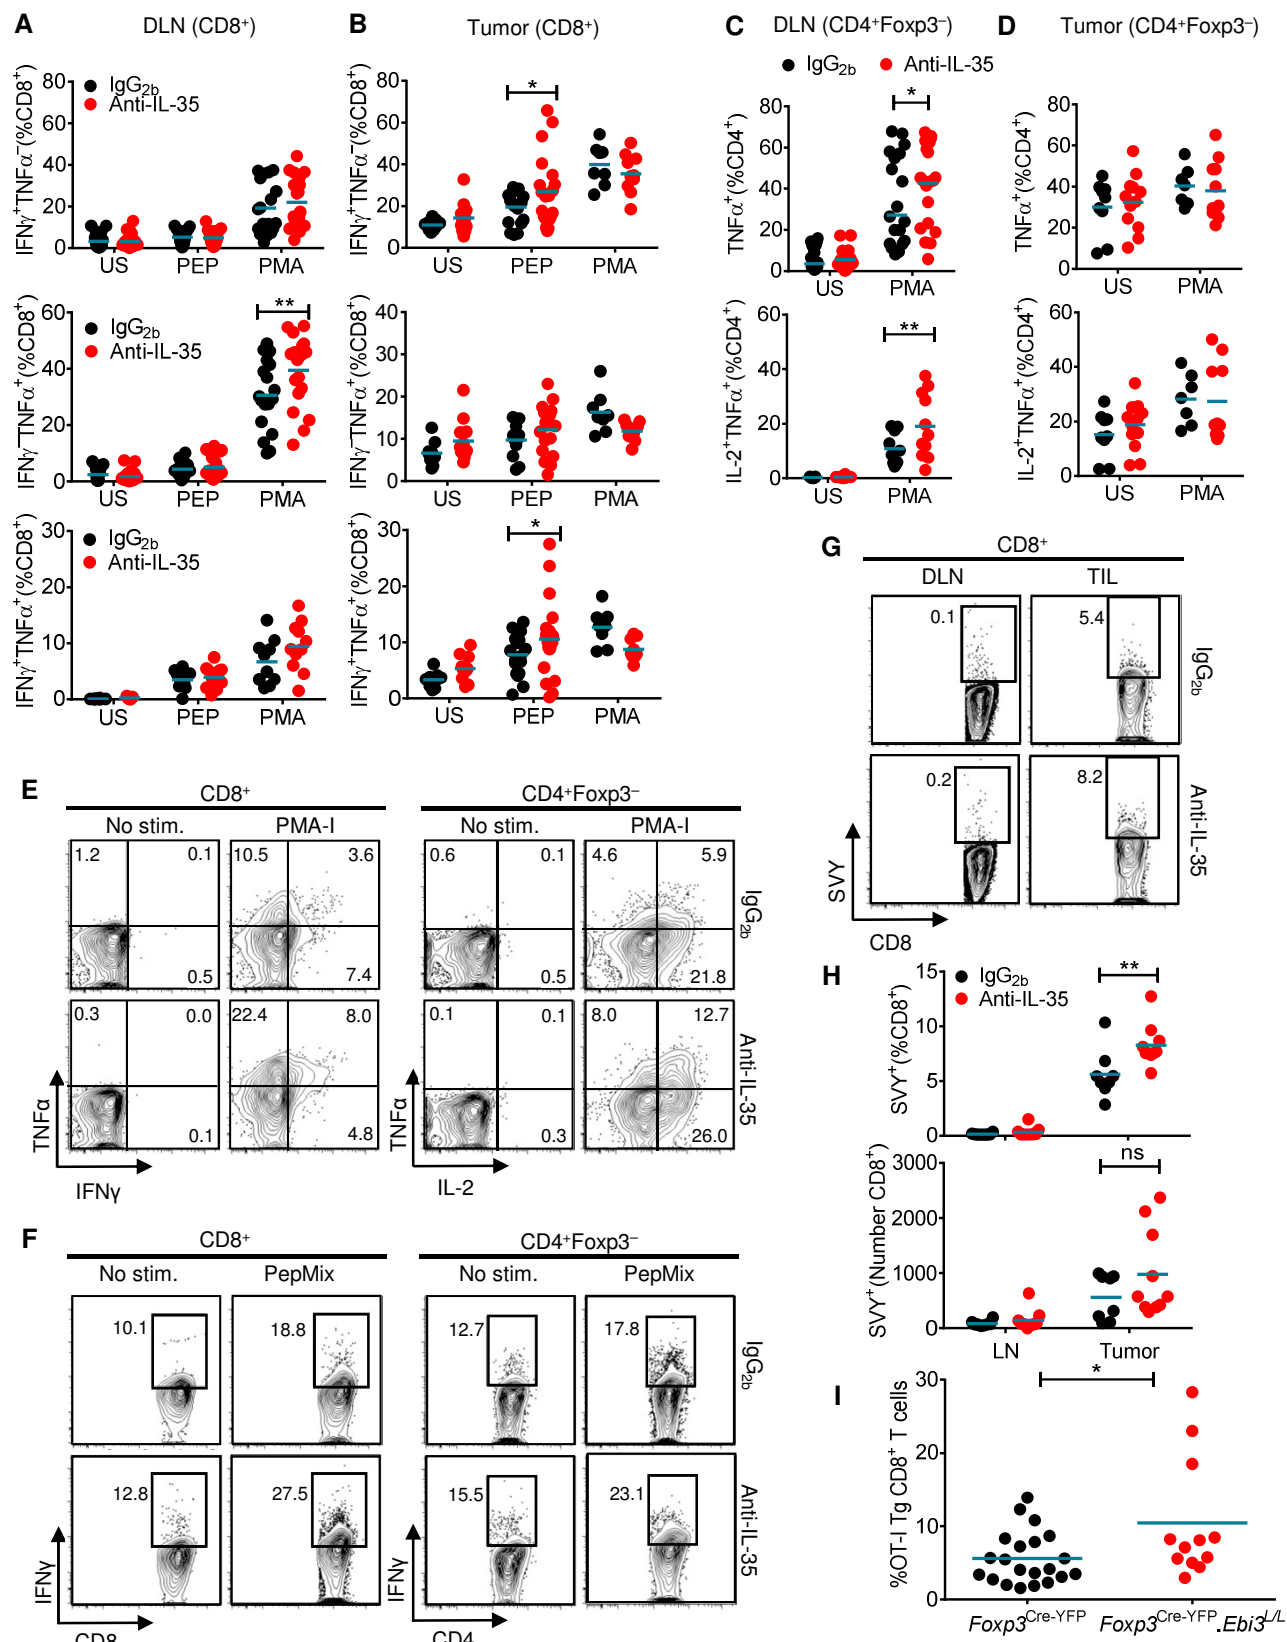

**Fig 7. Treg-specific IL-35 deletion results in loss of exhausted T cells in the tumor microenvironment**

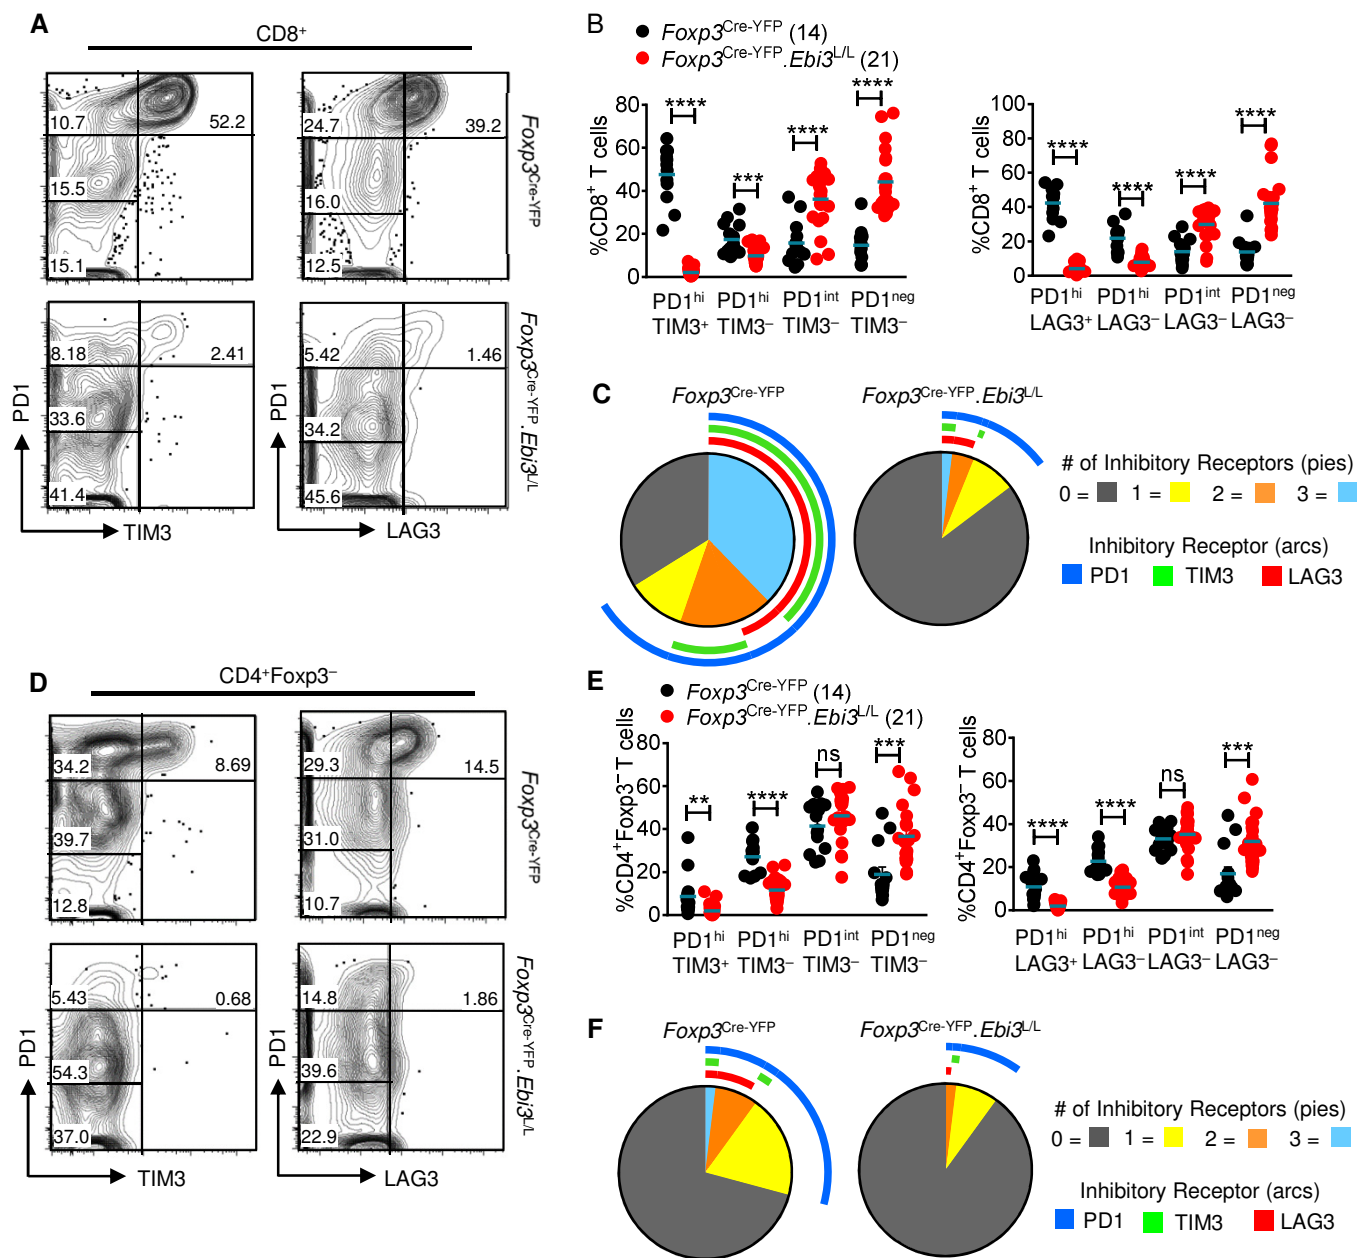

Supplement: NIHMS759121-supplement-2.pdf [file NIHMS759121-supplement-2.pdf]
